# Supplementary material for: Structure-based enzyme engineering improves donor-substrate recognition of Arabidopsis thaliana glycosyltransferases
Source: PubMed Central journal article supplement (PMC7419078; doi:10.1042/bcj20200477), 2020-08-07
Supplement: BCJ-477-2791-s1.pdf [file BCJ-477-2791-s1.pdf]

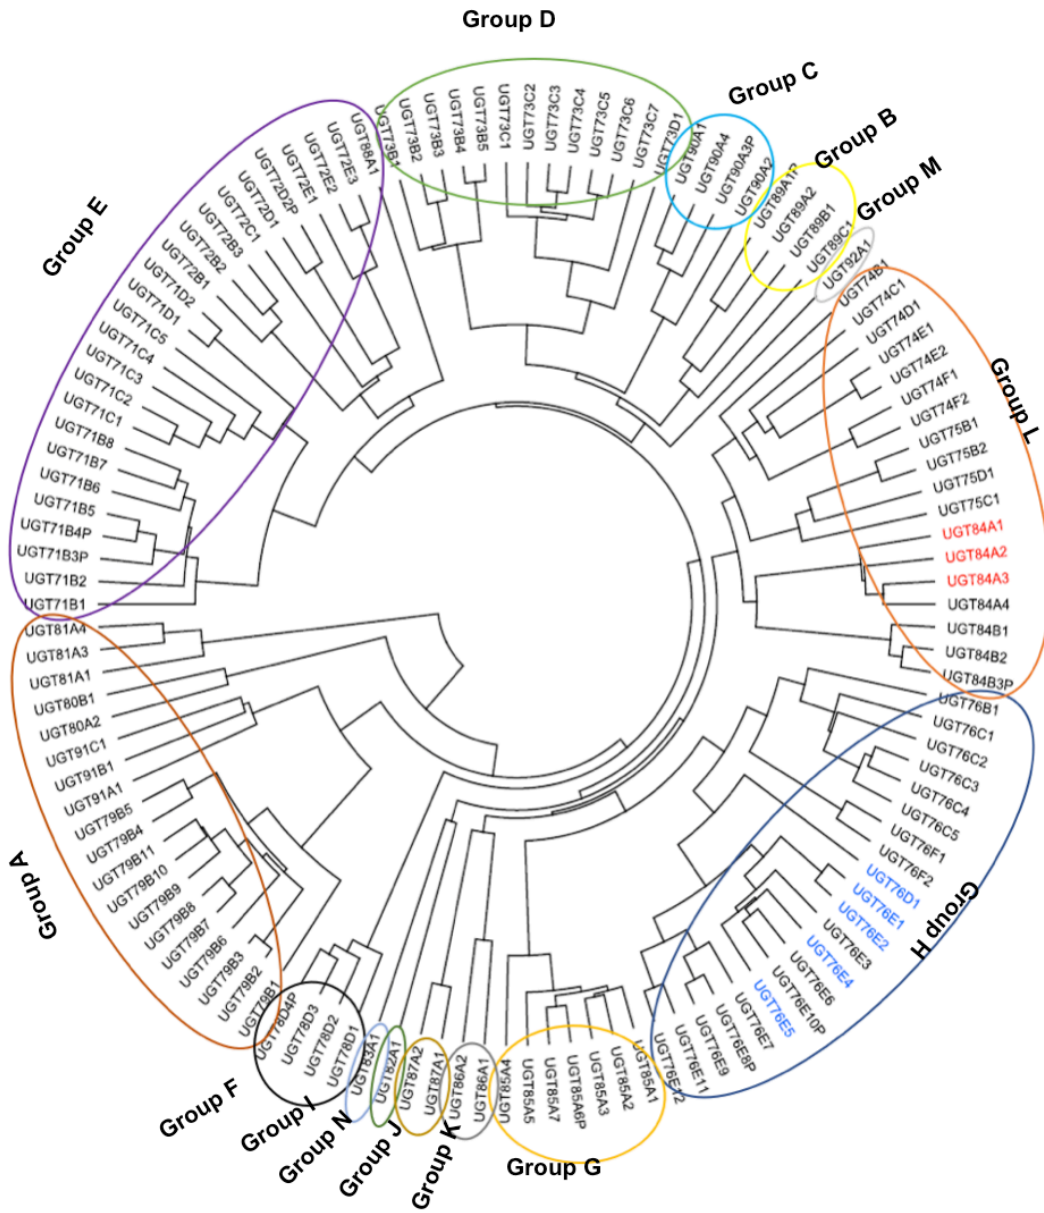

**Figure S1:** Phylogenetic tree showing 122 *Arabidopsis thaliana* UGT genes grouped into A-N (circled). Eight UGTs from groups H are printed in blue.

| Plant UGT         | PDB code                                     | In complex with                                                                                                                                                                   | Reference                        |
|-------------------|----------------------------------------------|-----------------------------------------------------------------------------------------------------------------------------------------------------------------------------------|----------------------------------|
| <i>At</i> UGT74F2 | 5V2K<br>5U6M<br>5U6N<br>5U6S<br>5V2J         | (T15A) with UDP and 2-bromobenzoic acid<br>UDP and salicylic acid<br>(T15S) with UDP and salicylic acid<br>UDP and 2-bromobenzoic acid<br>(T15S) with UDP and 2-bromobenzoic acid | George-Thompson et al. (2017)    |
| <i>At</i> UGT72B1 | 2VCE<br>2VCH<br>2VG8                         | UDP<br>UDP<br>UDP-2-fluoro-glucose and TCP                                                                                                                                        | Brazier-Hicks et al. (2007)      |
| <i>Mt</i> UGT78G1 | 3HBF<br>3HBJ                                 | UDP and myricetin<br>UDP                                                                                                                                                          | Modolo et al. (2007)             |
| <i>Mt</i> UGT71G1 | 2ACV<br>2ACW                                 | UDP<br>UDP-glucose                                                                                                                                                                | Shao et al. (2005)               |
| <i>Mt</i> UGT85H2 | 2PQ6                                         | None                                                                                                                                                                              | Li et al. (2007)                 |
| <i>Ct</i> UGT78K6 | 3WC4<br>4REL<br>4REM<br>4REN<br>4WHM         | None<br>Kaempferol<br>Delphinidin<br>Petunidin<br>UDP                                                                                                                             | Hiromoto et al. (2013), (2015)   |
| <i>Vv</i> GT1     | 2C1X<br>2C1Z<br>2C9Z                         | UDP<br>UDP-2-fluoro-glucose and<br>kaempferol<br>UDP and quercetin                                                                                                                | Offen et al. (2006)              |
| <i>Os</i> 79      | 5TMB<br>5TMD<br>5TME<br>6BK0<br>6BK1<br>6BK2 | UDP<br>U2F and trichothecene<br>UDP<br>Q202A with UDP<br>T291V with UDP<br>H122A/L123A with UDP                                                                                   | Wetterhorn et al. (2016), (2017) |
| <i>Ptig</i> S     | 5NLM                                         | Magnesium ion and 3-sulfooxy-1H-indole                                                                                                                                            | Hsu et al. (2018)                |
| <i>At</i> UGT89C1 | 6IJ7<br>6IJ9<br>6IJA<br>6IJD                 | None<br>UDP<br>UDP-rhamnose<br>Quercetin                                                                                                                                          | Zong et al., (2019)              |

**Table S1:** Crystal structures of plant UGTs available in the protein data bank.

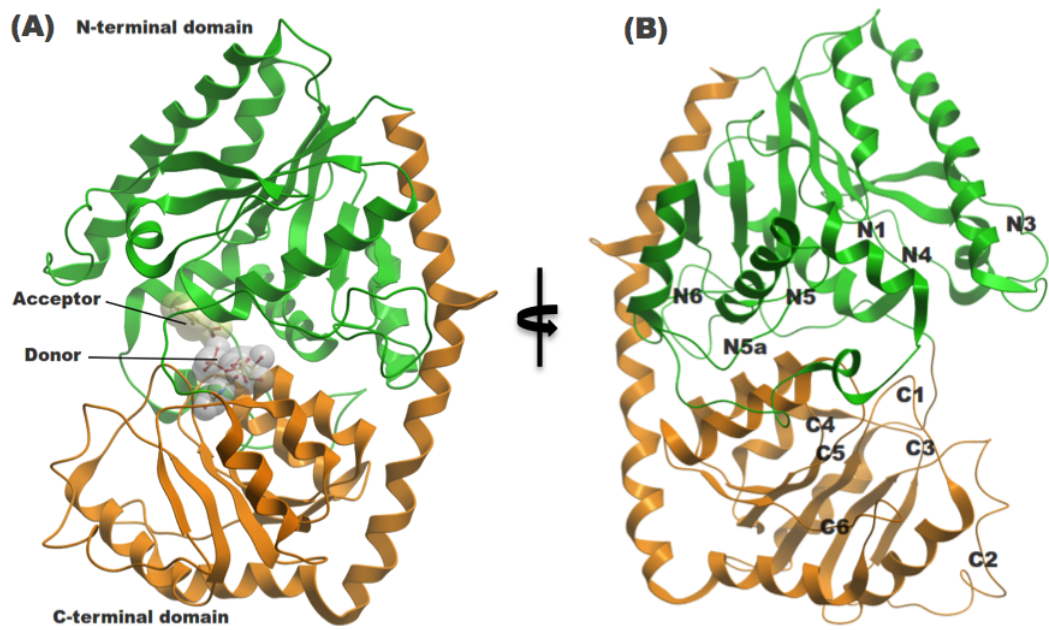

**Figure S2:** (A) Conserved GT-B fold of a representative of ten currently solved plant UGT crystal structures; The N- and C-terminal domains are (shown in green and orange respectively) with acceptor and donor substrates bound; (B) Loop regions of the N- and C-terminal domains in AtUGT74F2. These loop regions offer vital interactions with both acceptor and donor substrates in plant UGTs.

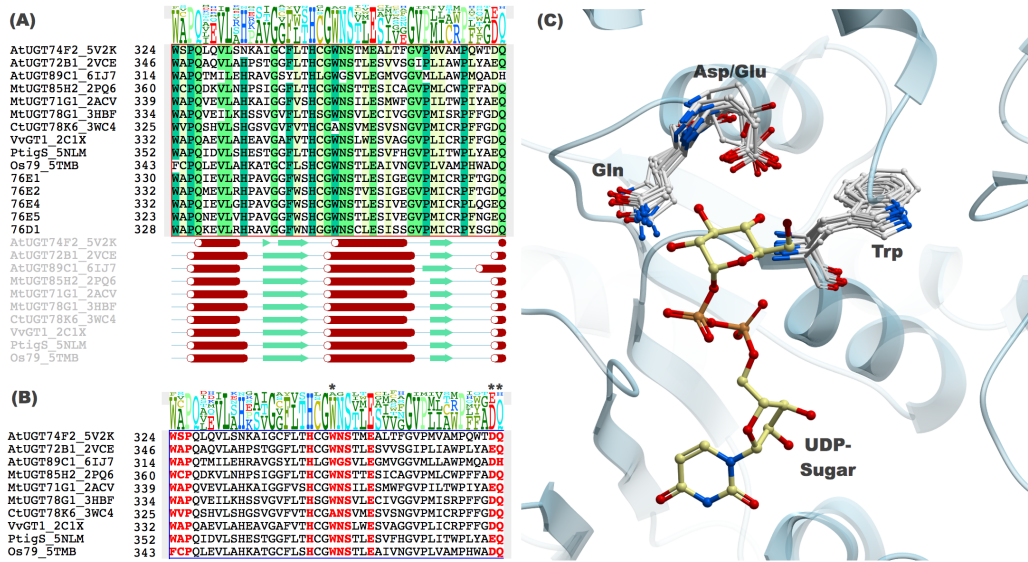

**Figure S3:** (A) Sequence alignment of the Plant Secondary Product Glycosyltransferase (PSPG) box, a characteristic structural feature of plant UGTs, from all ten crystal structures of plant UGTs solved and the five group H *At*UGTs reported in this study; (B) Conservation of key amino acid residues in the PSPG box motif in the crystal structures that interact with the sugar; (C) Structural superimposition of conserved residues (Tryptophan, Aspartic acid/Glutamic acid and Glutamine) from the ten plant crystal structures which interact with the sugar part of the UDP- donor sugar.

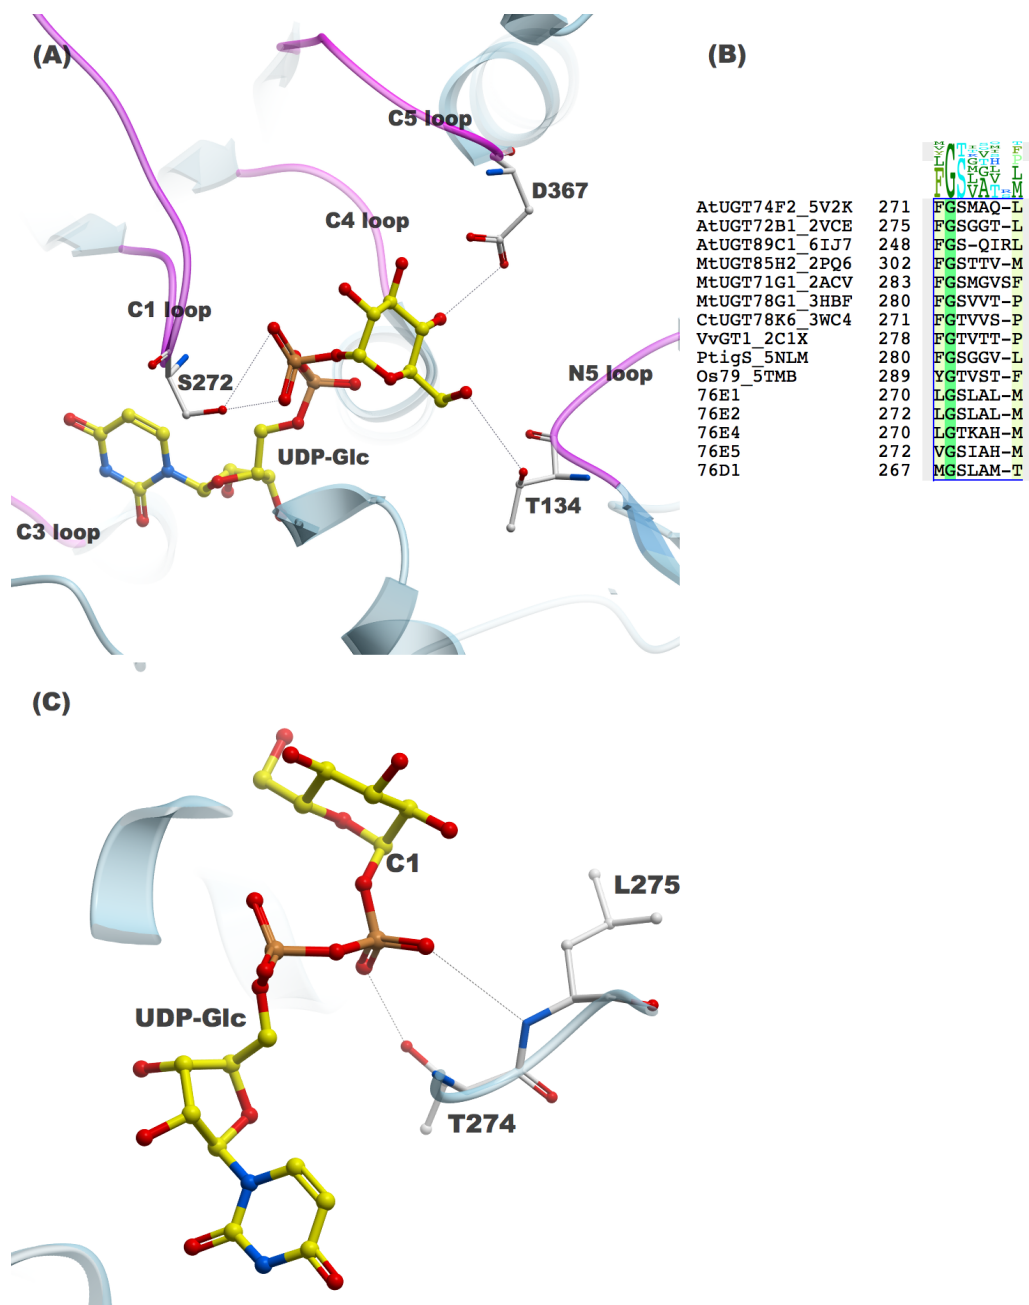

**Figure S4:** (A) Residues in loops from both C-terminal and N-terminal domain surround the UDP-sugar binding site and contribute to direct structural interactions; (B) Multiple sequence alignment highlighting C1 loop residues potentially involved in substrate recognition; (C) The spatial position of L275 in *AtUGT76E4* K275L mutant, highlighting the proximity to the reaction centre of UDP-Glucose, which may have helped improved donor specificity.

| System     | Donor Sugar | Ca RMSD (Å) |
|------------|-------------|-------------|
| 76E1       | Glc         | 4.01        |
|            | Gal         | 4.36        |
|            | GlcNAc      | 4.69        |
| 76E2       | Glc         | 3.89        |
|            | Gal         | 4.59        |
|            | GlcNAc      | 3.87        |
| 76E2 D374E | Gal         | 4.52        |
|            | GlcNAc      | 4.13        |
| 76E4       | Glc         | 4.93        |
|            | Gal         | 4.82        |
|            | GlcNAc      | 4.35        |
| 76E4 K275L | Glc         | 4.72        |
|            | Gal         | 4.58        |
|            | GlcNAc      | 4.22        |
| 76E5       | Glc         | 4.23        |
|            | Gal         | 3.72        |
|            | GlcNAc      | 3.89        |
| 76D1       | Glc         | 4.98        |
|            | Gal         | 3.89        |
|            | GlcNAc      | 4.28        |
| 76D1 P129T | Glc         | 4.27        |
|            | Gal         | 4.20        |
|            | GlcNAc      | 4.42        |

**Table S2:** Summary of simulations. All simulations were of 1 $\mu$ s each (see methods for details). RMSD of Ca were calculated from their positions in the starting structure and averaged over the total number of simulations.

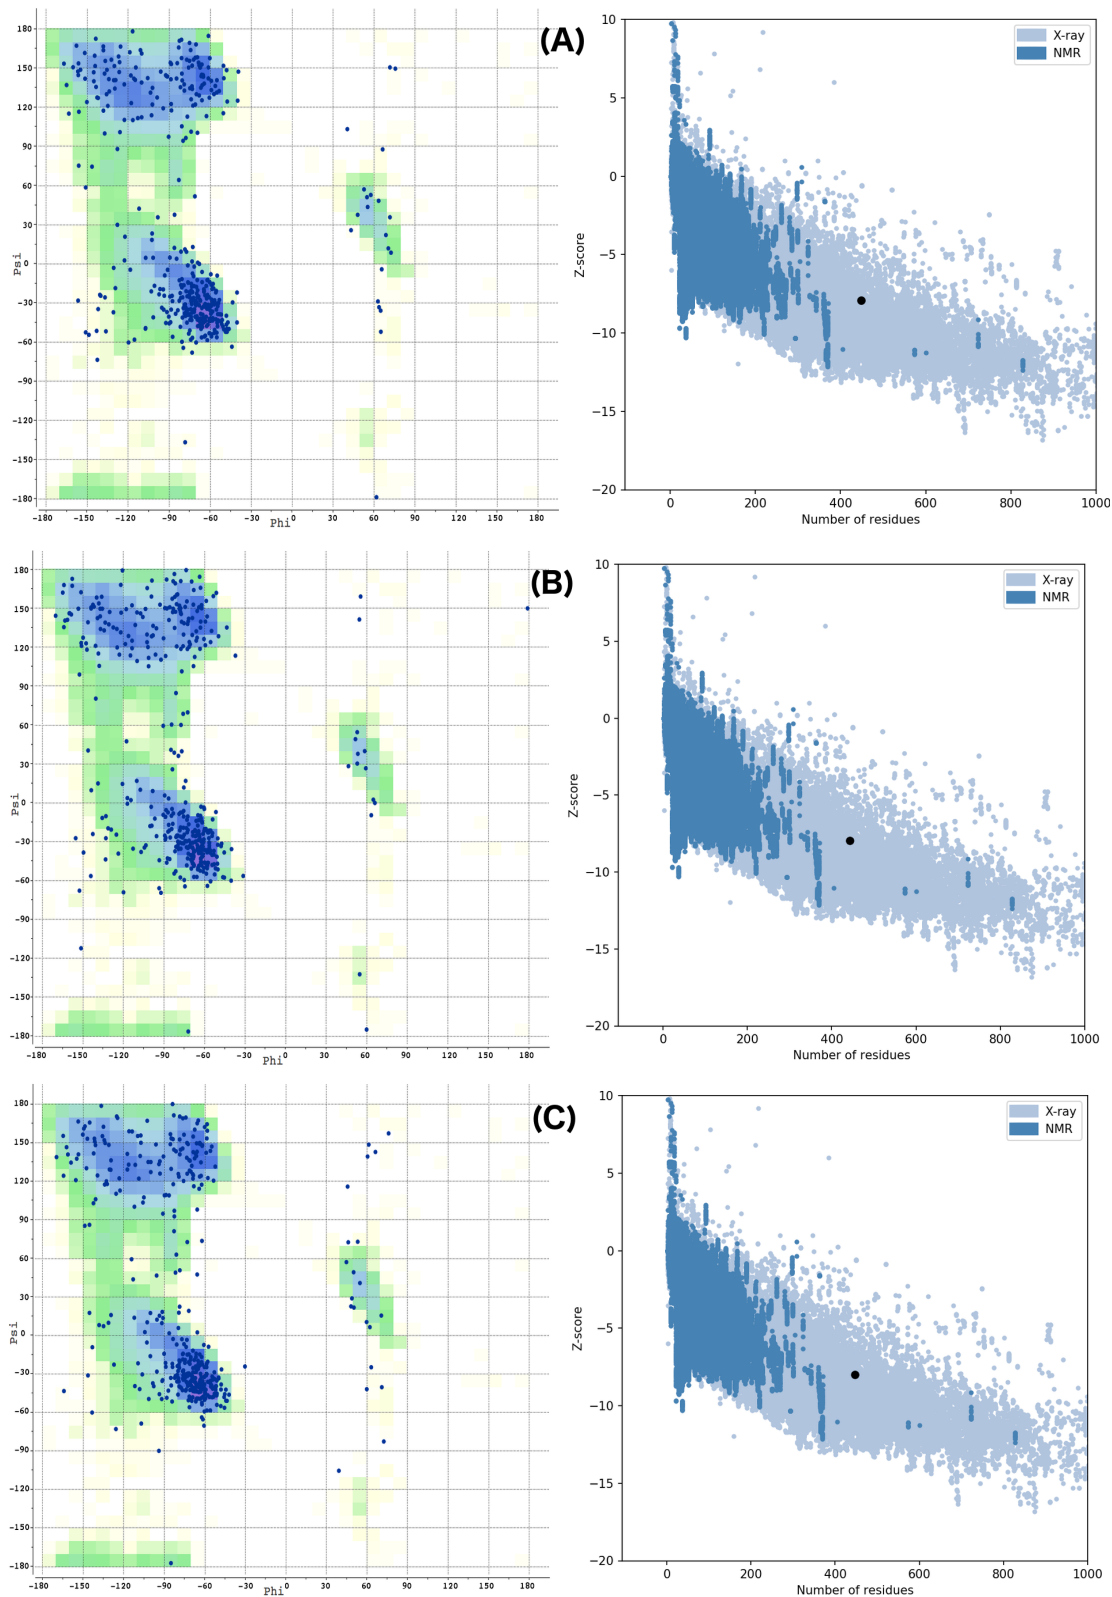

**Figure S5:** Stereochemical checks of the models. Ramachandran plots and PROSA analysis for models (A) 76E1, (B) 76E2, (C) 76E4. The black dot in each PROSA plot represents the Z-score. The Z-score is -7.91, -7.96 and -7.99 respectively.

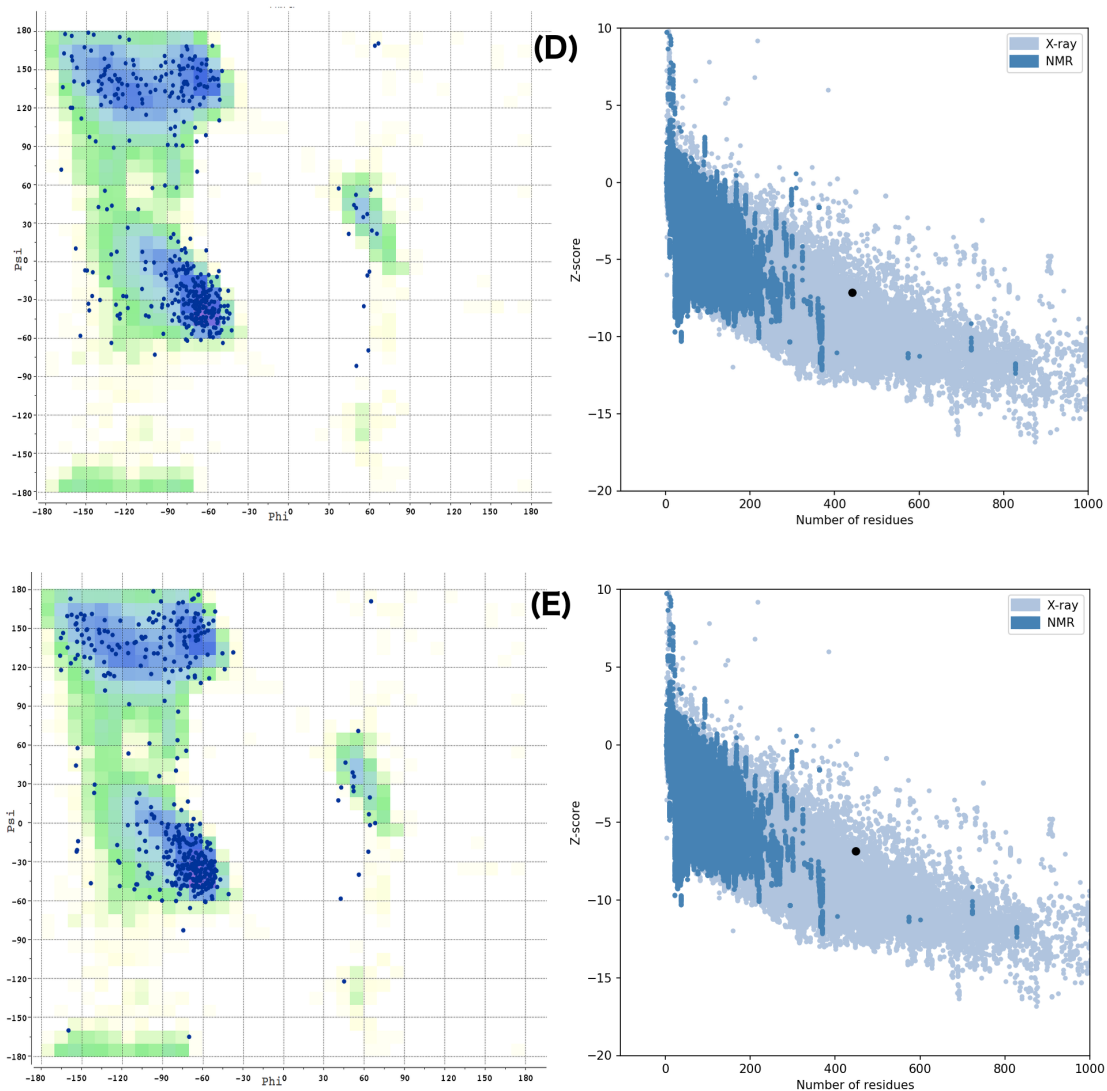

**Figure S5 (contd):** Stereochemical checks of the models. Ramachandran plots and PROSA analysis for models (D) 76E5 and (E) 76D1. The black dot in each PROSA plot represents the Z-score. The Z-score is -7.13 and -6.92 respectively.



| <i>AtUGT</i> | Residues within 5Å of sugar                                                       |
|--------------|-----------------------------------------------------------------------------------|
| 76E1         | H20, Y114, T134, L273, G371, D372, Q373, N376, H348, C349, G350, S351, S352, S353 |
| 76E2         | K275, Y116, H21, T136, G373, D374, Q375, N378, H350, C351, G352, W353, N354, S355 |
| 76E4         | K275, L115, H20, T135, G373, F374, H350, C351, G352, W353, N354, S355, Q375, N378 |
| 76E5         | I273, L115, H20, T143, G364, E365, Q366, N369, H341, C342, G343, W344, N345, S346 |
| 76D1         | L270, F109, H19, P129, G369, D370, Q371, N374, H346, G347, G348, W349, N350, S351 |

**Table S3:** Residues that lie within 5 Å of donor sugar

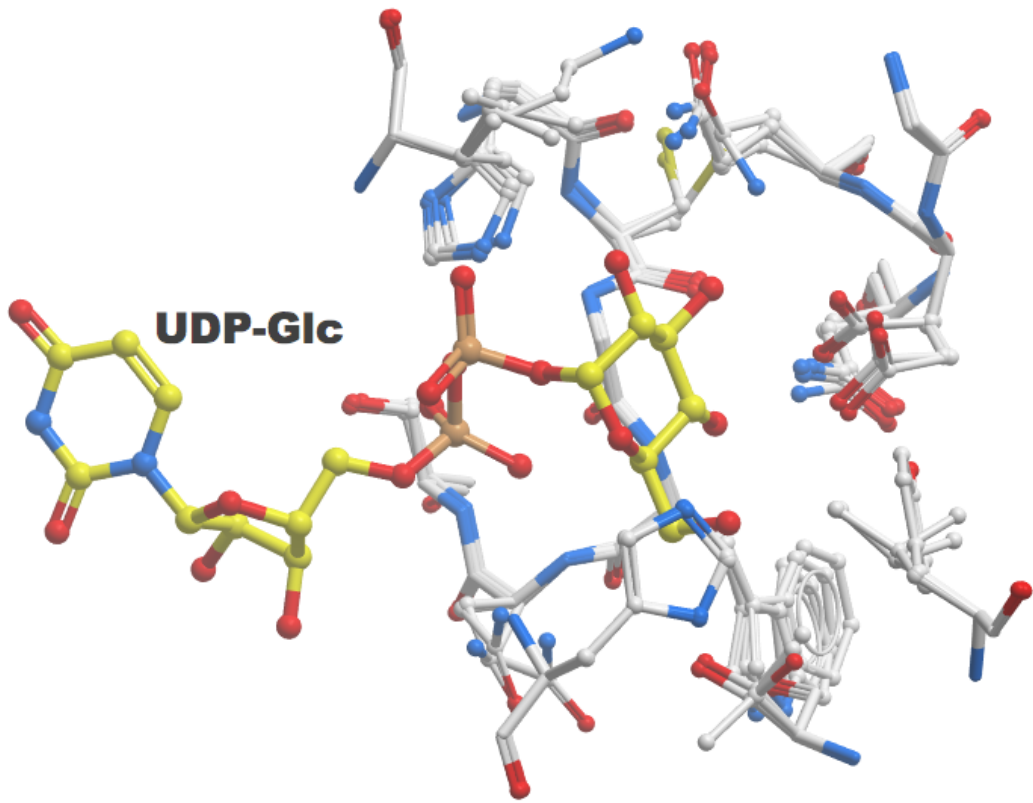

**Figure S6:** Side chains of 14 residues lie within 5Å of the donor sugar. All 5 *At*UGTs have been superimposed on 76E1-UDP-Glc complex.

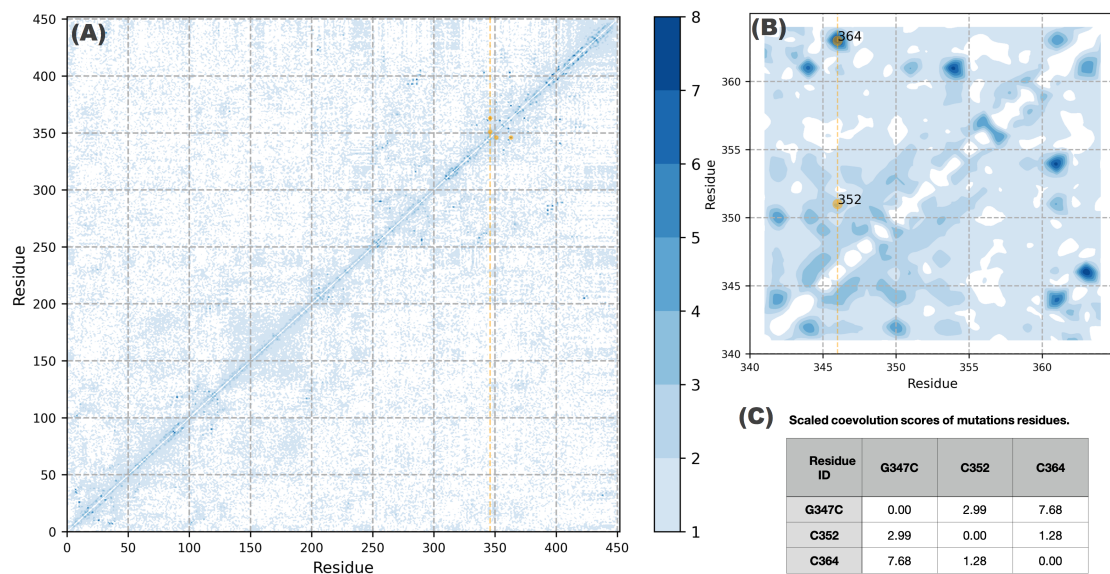

**Figure S7:** Scaled coevolution score matrix for UDP-glycosyltransferase 76D1 highlighting (A) full length sequence and (B) residues 340-365. Residue pairs with non-significant score ( $<1$ ) are shown in white. Residue 347 is shown by an orange line and its pairings with 352 and 364 are highlighted by orange circles; (C) Pairwise coevolution scores between residue pairs. G347 shows strongest coevolution signal with C364. The maximum scaled coevolution score was 8.3
